# Supplementary material for: Influenza Vaccination in Coronavirus Times: Intention to Be Vaccinated by Primary Care Professionals in Central Catalonia (VAGCOVID)
Source: Research Square preprint supplement (doi:10.21203/rs.3.rs-607245/v1), 2021-07-07
Supplement: Supplementary file 1 [file 7632bcba6df4270cee04c35c.docx]

Annex I. Poll

1) What is your gender?

Male Female Other NR/DK *Go to question 2*

2) What year were you born? *Go to question 3*

3) In what country were you born? *Go to question 4*

5) What is your marital status?

Single Married or coupled Separated or divorced Widower *Go to question 6*

6) If you have one or more of the following risk factors, please indicate:

Chronic kidney disease Metabolic disease Cardiovascular disease Respiratory disease Immunosuppression Cancer and malignant haemopathy Digestive disease Hemoglobinopathy/anemia Pregnancy > 60 years Neuromuscular disease Cochlear implant *Go to question 7*

7) What is your professional category?

Group A (university degree) Group B (senior technician) Group C (baccalaureate or ESO graduate technician) *Go to question 8*

8) What is your employment situation?

Fix Interim Substitute Resident *Go to question 9*

9) How many years have you been practicing?

<5 years 5-10 years 11-15 years 16-20 years >21 years

Go to question 10

10) Do you perform physical presence guards?

Yes No NR/DK *Go to question 11*

11) Do you have one or more of the following dependants?

Children (up to 14 years old) Person in a situation of physical and/or mental dependence > 60 years old

Go to question 12 if you answer one or more of the options.

Go to question 13 if you don’t have any dependant.

12) Do you think that any of the people you care for have a high risk of getting the flu this year?

Yes No NR/DK *Go to question 12*

*13)* Do you think that you will be at high risk of getting the flu this year?

Yes No NR/DK *Go to question 13*

14) Did you get the flu vaccine last year?

Yes No NR/DK *Go to question 14*

15) Have you been vaccinated against the flu on any other occasion?

Yes No NR/DK *Go to question 15*

16) Do you plan to get vaccinated against the flu this year?

Yes No NR/DK *Go to question 17*

*17) Choose the answer that best relates the pandemic situation of Covid and your intention to get vaccinated against the flu this year*

1. I will get vaccinated, regardless of the pandemic situation of Covid.
2. I will get vaccinated due to the pandemic situation of Covid.
3. I will not get vaccinated despite the pandemic situation of Covid.
4. I will not get vaccinated, regardless of the pandemic situation of Covid.
5. Don't know / Don't answer

Go to question 18

18) Choose the answer that best relates the protection that the mask gives you and your intention to get vaccinated against the flu.

- 1. Even if the mask protects me, I will get vaccinated.
  2. The mask does not fully protect me and that is why I will get vaccinated.
  3. The mask does not fully protect me, but I will not get vaccinated.
  4. Since the mask protects me, I will not get vaccinated.
  5. Don't know / Don't answer

Go to question 19

19) Choose the answer that best relates the protection that hand washing gives you and your intention to get vaccinated against the flu.

1. Even if hand washing protects me, I will get vaccinated.
2. Hand washing does not fully protect me and that is why I will get vaccinated.
3. Hand washing does not fully protect me, but I will not get vaccinated.
4. Since hand washing protects me, I will not get vaccinated.
5. Don't know / Don't answer

Go to question 19

20) Choose the answer that best relates the protection that physical distancing gives you and your intention to get vaccinated against the flu.

1. Even if physical distancing protects me, I will get vaccinated.
2. Physical distancing does not fully protect me, and that is why I will get vaccinated.
3. Physical distancing does not fully protect me, but I will not get vaccinated.
4. Since physical distancing protects me, I will not get vaccinated.
5. Don't know / Don't answer

Go to question 21

21) In the future, we may need your opinion again. In order to relate your answers anonymously, we ask you to enter a personal identification code that you can easily remember and that shall consist of the last 3 numbers of your mobile phone and the last 3 numbers (no letter) of your ID card.

- Number: ............................................................
